# Supplementary material for: Global Ex-Situ Crop Diversity Conservation and the Svalbard Global Seed Vault: Assessing the Current Status
Source: PLoS One. 2013 May 9;8(5):e64146. doi: 10.1371/journal.pone.0064146 (PMC3650076; doi:10.1371/journal.pone.0064146)
Supplement: Table S2 — The ten largest collections worldwide of the 29 largest food crop genera in WIEWS. Genebanks are identified by WIEWS coding [23]. (XLSX) [file pone.0064146.s002.xlsx]

## Sheet: Sheet1
Crops	Major holders rank
	1			2			3			4			5			6			7			8			9			10			WIEWS_total	TotalSGSVacc	ShareAccSGSV	Inst_at_SGSV	SDA_covered
	Inst	WIEWS	SGSV	Inst	WIEWS	SGSV	Inst	WIEWS	SGSV	Inst	WIEWS	SGSV	Inst	WIEWS	SGSV	Inst	WIEWS	SGSV	Inst	WIEWS	SGSV	Inst	WIEWS	SGSV	Inst	WIEWS	SGSV	Inst	WIEWS	SGSV
Oryza (Rice)	PHL001	109136	116651	IND001	86119	0	CHN121	70104	0	CHN001	69798	0	JPN003	44489	0	IND008	29596	0	KOR011	26906	1064	USA970	23090	4585	CIV033	21527	12216	CHN094	20000	0	500765	134516	0.268621	4	5
Triticum (Wheat)	MEX002	110281	76449	USA029	57348	9562	CHN001	41030	0	IND001	35889	0	SYR002	34951	33253	JPN003	34652	0	RUS001	34253	1000	ITA004	32751	0	DEU146	26842	1416	AUS003	23811	0	431808	121680	0.281792	5	7
Hordeum (Barley)	CAN004	40031	8719	USA029	29874	6869	BRA003	29227	0	SYR002	26679	25899	JPN003	23471	0	DEU146	22093	2425	CHN001	18617	0	KOR011	17660	3289	RUS001	16791	997	ETH085	16388	0	240831	48198	0.200132	6	7
Sorgum (Sorghum)	IND002	37904	31312	USA016	36173	4699	CHN001	18263	0	IND001	17466	0	ETH085	9772	8	USA995	7537	4699	BRA001	7225	0	KEN015	5866	578	JPN003	5074	0	AUS048	4487	0	149767	41296	0.275735	4	7
Zea (Maize)	MEX002	26581	22800	PRT001	24529	0	USA020	19970	882	CHN001	19088	0	MEX008	14067	0	MEX001	10500	0	RUS001	10483	1055	MEX022	9988	0	IND001	6909	0	MEX006	6550	0	148665	24737	0.166394	3	5
Glycine (Soybean)	CHN001	32021	0	USA033	21075	9566	KOR011	17644	2015	TWN001	15314	0	CHN002	13900	0	BRA014	11800	0	JPN003	11473	0	BRA003	9179	0	CHN013	8152	0	RUS001	6439	0	146997	11581	0.0787839	4	6
Phaseolus (Common bean)	COL003	35891	30097	USA022	14674	685	BRA008	14460	0	BRA003	14069	0	MEX008	12752	0	MEX001	10000	0	DEU146	8680	1639	BRA044	7460	0	CHN001	7365	0	RUS001	6144	158	131495	32579	0.247758	5	6
Vigna (Cowpea)	NGA039	18873	13985	CHN001	13407	0	USA016	12845	113	IND001	11796	0	TWN001	10725	8191	PHL130	8950	754	JPN003	7927	0	IND885	6569	0	BRA003	5744	0	IND064	5352	0	102188	23043	0.225496	4	7
Avena (Oat)	CAN004	27676	3485	USA029	21195	5504	CAN128	12000	0	RUS001	11857	215	DEU146	4799	353	KEN015	4197	0	AUS003	3674	0	CHN001	3357	0	GBR011	2598	0	POL003	2328	0	93681	9557	0.102016	5	7
Arachis (Groundnut)	IND002	15419	8965	IND001	13144	0	USA016	9964	345	IND025	8934	0	ARG1342	8347	0	NER047	7262	0	CHN001	6565	0	IND090	6274	0	CHN003	5688	0	ARG1348	3791	0	85388	9310	0.109032	2	3
Cicer (Chickpea)	IND002	20140	17106	IND001	14704	0	SYR002	13219	10476	AUS039	8655	42	USA022	6195	0	IRN029	5700	0	PAK001	2146	417	RUS001	2091	71	TUR001	2075	0	IND004	2000	0	76925	28112	0.365447	6	7
Solanum (Potato, Eggplant, Tomato)	RUS001	11971	380	TWN001	11259	2020	FRA179	10663	0	PER001	7508	4401	USA003	6516	6371	DEU159	5675	860	USA004	5659	0	IND001	5099	0	JPN003	4831	0	USA176	3443	0	72624	14032	0.193214	5	6
Pennisetum (Pearl millet)	IND002	21583	19045	BRA001	7225	0	IND064	5772	0	FRA202	4405	0	CAN004	3816	3	IND001	3609	0	NER047	2817	0	UGA001	2142	0	USA016	2063	260	NER001	2052	0	55484	19308	0.347992	3	4
Brassica (Cabbage)	IND001	10140	0	CHN001	9769	0	IND073	7314	0	IND1453	5440	0	CHN003	5168	0	AUS039	4060	0	JPN003	3987	0	RUS001	3503	100	GBR006	3355	0	CHN004	3101	0	55837	100	0.00179093	2	3
Vicia (Fababean)	SYR002	15294	9470	RUS001	7010	236	AUS039	5314	0	DEU146	5175	713	CHN001	4453	0	ITA004	3630	0	ESP004	2768	0	USA022	2430	257	TUR001	2360	0	BGR001	2128	0	50562	10676	0.211147	5	5
Pisum (Pea)	AUS039	7230	301	RUS001	6653	48	SYR002	6129	3796	DEU146	5508	866	USA022	5399	1531	ITA004	4090	0	CHN001	3825	0	GBR165	3302	0	GBR011	3172	0	IND001	3070	0	48378	6542	0.135227	5	6
Setaria (Foxtail millet)	CHN001	26233	0	IND001	4392	0	FRA202	3500	0	JPN003	2531	0	IND874	2512	0	IND002	1535	1413	USA020	1010	713	FRA166	850	0	KEN015	786	0	BGD164	515	0	43864	2126	0.048468	4	5
Lens (Lentil)	SYR002	10864	10775	IND001	9989	0	AUS039	5251	0	IND885	3086	0	IRN029	3011	0	USA022	2874	0	RUS001	2375	139	CHL004	1345	0	CAN004	1171	375	HUN003	1074	0	41040	11289	0.275073	5	7
Cajanus (Pigeon pea)	IND002	13289	9734	IND001	12859	0	IND886	5195	0	IND037	2268	0	IND004	1500	0	KEN015	1288	54	PHL130	629	18	AUS048	406	0	BRA003	279	0	NPL055	228	0	37941	9806	0.258454	3	7
Capsicum (Peppers)	TWN001	7860	281	USA016	4698	255	MEX008	4661	0	IND001	3835	0	MEX003	3590	0	MEX009	3590	0	BRA006	2321	0	JPN003	2271	0	BRA012	2000	0	PHL130	1880	0	36706	536	0.0146025	3	5
Sesamum (Sesame)	IND001	8413	0	CHN001	4726	0	IND064	4629	0	IND037	4438	0	CHN003	4251	0	ISR001	3000	0	KEN015	2477	0	BRA003	1950	0	JPN003	1789	0	MEX001	1600	0	37273	0	0	1	5
Eleusine (Finger millet)	IND001	9522	0	IND874	6257	0	IND002	5949	5818	KEN015	2931	571	ETH085	2173	0	UGA001	1231	0	ZMB030	1040	32	IND139	1019	0	NPL055	869	0	USA016	766	674	31757	7095	0.223415	4	5
Triticale (Wheat x Rye)	MEX002	17394	19838	RUS001	2030	0	USA029	2009	107	CAN091	2000	0	UKR001	1748	0	POL025	1748	0	DEU146	1577	108	BGR001	992	0	SVK001	800	0	UZB006	675	0	30973	20053	0.647435	5	6
Cucumis (Cucumbers, True Melons)	USA020	4878	1121	JPN003	4242	0	RUS001	2998	0	CHN001	2892	0	BRA012	2400	0	KAZ004	2377	0	CHN004	1927	0	FRA215	1399	0	DEU146	1154	230	IND001	1070	0	25337	1351	0.0533212	3	5
Helianthus (Sunflower)	SRB002	5450	0	USA020	3836	1438	CHN001	2646	0	FRA040	2500	0	BRA014	2400	0	BRA003	2312	0	RUS001	1701	0	AUS048	1290	0	IND041	1260	0	MAR088	1223	0	24618	1438	0.0584125	2	5
Lupinus (Lupin)	AUS002	3880	0	AUS039	3412	0	DEU146	2464	137	RUS001	2411	24	FRA001	2046	0	PER003	1940	0	PER027	1800	0	PER029	1725	0	ESP010	1519	0	GBR045	1300	0	22497	161	0.00715651	3	4
Ipomoea (Sweet potato)	PER001	6417	1918	JPN003	5736	0	USA016	1208	1	JPN038	1178	0	JPN010	1162	0	PNG039	1161	0	BRA012	1043	0	JPN039	819	0	CHN146	800	0	TWN006	757	0	20281	1919	0.0946206	3	3
Allium (Onion)	IND1457	2050	0	RUS001	1888	0	JPN003	1352	0	USA003	1304	0	DEU146	1264	152	GBR004	1100	0	TWN001	1082	0	USA022	1066	0	GBR165	1005	0	HUN001	993	0	13104	152	0.0115995	3	5
Amaranthus (Amaranth)	IND001	5760	0	USA020	3341	965	IND032	2658	0	BRA003	2328	0	PER027	1600	0	CHN001	1459	0	IND037	1184	0	HUN003	782	0	TWN001	709	237	ARG082	700	0	20521	1202	0.0585741	2	6

## Sheet: DV-IDENTITY-0
#VALUE!	#VALUE!	#VALUE!	#VALUE!	#VALUE!	#REF!	#REF!	#VALUE!	#VALUE!	#VALUE!	#REF!	#REF!	#VALUE!	#VALUE!	#VALUE!	#REF!	#REF!	#REF!	0	#VALUE!	#REF!	#REF!	#REF!	#REF!	#REF!	#REF!	#REF!	#REF!	#REF!	#REF!	#VALUE!	#VALUE!	#VALUE!	#REF!	#VALUE!	#VALUE!	0	#VALUE!	#REF!	#REF!	#REF!	#REF!	#REF!	#REF!	#REF!	#REF!	#REF!	#REF!	#VALUE!	#VALUE!
#REF!	#REF!	#REF!	#REF!	#REF!	#REF!	#REF!	#REF!	#VALUE!	#VALUE!	#VALUE!	#REF!	#VALUE!	#VALUE!	AAAAAGP++w4=	#VALUE!	#REF!	#REF!	#REF!	#REF!	#REF!	#REF!	#REF!	#REF!	#REF!	#REF!	#VALUE!	#VALUE!	#VALUE!	#REF!	#VALUE!	#VALUE!	AAAAAGP++yA=	#VALUE!	#REF!	#REF!	#REF!	#REF!	#REF!	#REF!	#REF!	#REF!	#REF!	#REF!	#VALUE!	#VALUE!	#VALUE!	#REF!	#VALUE!	#VALUE!
#REF!	#REF!	#REF!	#REF!	#VALUE!	#VALUE!	#VALUE!	#REF!	#VALUE!	#VALUE!	#VALUE!	#VALUE!	#REF!	#REF!	#REF!	#REF!	#REF!	#REF!	#REF!	#REF!	#REF!	#REF!	#VALUE!	#VALUE!	#VALUE!	#REF!	#VALUE!	#VALUE!	#VALUE!	#VALUE!	#REF!	#REF!	#REF!	#REF!	#REF!	#REF!	#REF!	#REF!	#REF!	#REF!	#VALUE!	#VALUE!	#VALUE!	#REF!	#VALUE!	#VALUE!	#REF!	#REF!	#REF!	#REF!
0	#VALUE!	#VALUE!	#VALUE!	#VALUE!	#REF!	#VALUE!	#VALUE!	#VALUE!	#REF!	#VALUE!	#VALUE!	#VALUE!	#REF!	#VALUE!	#VALUE!	#VALUE!	#REF!	#VALUE!	#VALUE!	#VALUE!	#REF!	#VALUE!	#VALUE!	#VALUE!	#REF!	#VALUE!	#VALUE!	#VALUE!	#REF!	#VALUE!	#VALUE!	#VALUE!	#REF!	#VALUE!	#VALUE!	#VALUE!	#REF!	#VALUE!	#VALUE!	#VALUE!	#REF!	#VALUE!	#VALUE!	#VALUE!	#VALUE!	#VALUE!	#VALUE!	#VALUE!	#VALUE!
#VALUE!	#VALUE!	#VALUE!	#VALUE!	#VALUE!	#VALUE!	#VALUE!	#VALUE!	#VALUE!	#VALUE!	#VALUE!	#REF!	#VALUE!	#VALUE!	#VALUE!	#REF!	#VALUE!	#VALUE!	#VALUE!	#REF!	#VALUE!	#VALUE!	#VALUE!	#REF!	#VALUE!	#VALUE!	#VALUE!	#REF!	#VALUE!	#VALUE!	#VALUE!	#REF!	#VALUE!	#VALUE!	#VALUE!	#REF!	#VALUE!	#VALUE!	#VALUE!	#REF!	#VALUE!	#VALUE!	#VALUE!	#REF!	#VALUE!	#VALUE!	#VALUE!	#REF!	#VALUE!	#VALUE!
#VALUE!	#VALUE!	#VALUE!	#VALUE!	#VALUE!	#REF!	#VALUE!	#VALUE!	#VALUE!	#REF!	#VALUE!	#VALUE!	#VALUE!	#REF!	#VALUE!	#VALUE!	#VALUE!	#REF!	#VALUE!	#VALUE!	#VALUE!	#REF!	#VALUE!	#VALUE!	#VALUE!	#REF!	#VALUE!	#VALUE!	#VALUE!	#REF!	#VALUE!	#VALUE!	#VALUE!	#REF!	#VALUE!	#VALUE!	#VALUE!	#REF!	#VALUE!	#VALUE!	#VALUE!	#REF!	#VALUE!	#VALUE!	#VALUE!	#VALUE!	#VALUE!	#VALUE!	#VALUE!	#VALUE!
#VALUE!	#VALUE!	#VALUE!	#REF!	#VALUE!	#VALUE!	#VALUE!	#REF!	#VALUE!	#VALUE!	#VALUE!	#REF!	#VALUE!	#VALUE!	#VALUE!	#REF!	#VALUE!	#VALUE!	#VALUE!	#REF!	#VALUE!	#VALUE!	#VALUE!	#REF!	#VALUE!	#VALUE!	#VALUE!	#REF!	#VALUE!	#VALUE!	#VALUE!	#REF!	#VALUE!	#VALUE!	#VALUE!	#REF!	#VALUE!	#VALUE!	#VALUE!	#VALUE!	#VALUE!	#VALUE!	#VALUE!	#VALUE!	#VALUE!	#VALUE!	#VALUE!	#VALUE!	#VALUE!	#REF!
#VALUE!	#REF!	#VALUE!	#VALUE!	#VALUE!	#REF!	#VALUE!	#VALUE!	#VALUE!	#REF!	#VALUE!	#VALUE!	#VALUE!	#REF!	#VALUE!	#VALUE!	#VALUE!	#REF!	#VALUE!	#VALUE!	#VALUE!	#REF!	#VALUE!	#VALUE!	#VALUE!	#REF!	#VALUE!	#VALUE!	#VALUE!	#REF!	#VALUE!	#VALUE!	#VALUE!	#VALUE!	#VALUE!	#VALUE!	#VALUE!	#VALUE!	#VALUE!	#VALUE!	#VALUE!	#VALUE!	#VALUE!	#REF!	#VALUE!	#VALUE!	#VALUE!	#REF!	#VALUE!	#VALUE!
#VALUE!	#VALUE!	#VALUE!	#REF!	#VALUE!	#VALUE!	#VALUE!	#REF!	#VALUE!	#VALUE!	#VALUE!	#REF!	#VALUE!	#VALUE!	#VALUE!	#REF!	#VALUE!	#VALUE!	#VALUE!	#REF!	#VALUE!	#VALUE!	#VALUE!	#REF!	#VALUE!	#VALUE!	#VALUE!	#VALUE!	#VALUE!	#VALUE!	#VALUE!	#VALUE!	#VALUE!	#VALUE!	#VALUE!	#VALUE!	#VALUE!	#REF!	#VALUE!	#VALUE!	#VALUE!	#REF!	#VALUE!	#VALUE!	#VALUE!	#REF!	#VALUE!	#VALUE!	#VALUE!	#REF!
#VALUE!	#REF!	#VALUE!	#VALUE!	#VALUE!	#REF!	#VALUE!	#VALUE!	#VALUE!	#REF!	#VALUE!	#VALUE!	#VALUE!	#REF!	#VALUE!	#VALUE!	#VALUE!	#REF!	#VALUE!	#VALUE!	#VALUE!	#VALUE!	#VALUE!	#VALUE!	#VALUE!	#VALUE!	#VALUE!	#VALUE!	#VALUE!	#VALUE!	#VALUE!	#REF!	#VALUE!	#VALUE!	#VALUE!	#REF!	#VALUE!	#VALUE!	#VALUE!	#REF!	#VALUE!	#VALUE!	#VALUE!	#REF!	#VALUE!	#VALUE!	#VALUE!	#REF!	#VALUE!	#VALUE!
0	0	0	0	0	AAAAAH+v+gU=	AAAAAH+v+gY=
[truncated: 206 more columns]
